# Supplementary material
Source: Research Square preprint supplement (doi:10.21203/rs.3.rs-9256377/v1)
Supplement: Supplementary file 1 [file a3766ab8f823b9bad47ce43f.docx]

Supporting information for

**Alleviating Phosphorus Starvation and Saline Stress in Soybean: The Role of Endophytic Streptomyces sp. M57 in Soil-Plant Microecological Regulation**

Bin Yang1, †;

Kunpeng Cui1, †, * E-mail: cuikunpeng@qdu.edu.cn;

Yingjiao Hu1;

Shuang Wang1;

Chenxing Liang1;

Zhe Zhao1;

Yusheng Niu1,2, * E-mail: nys@qdu.edu.cn;

† Authors contributed equally to this work.

* Corresponding author

**1** Institute of Biomedical Engineering, College of Life Sciences, Qingdao University, Qingdao, 266071, PR China.

**2** Research Institute of Modern Agricultural Industry Innovation in Yellow River Delta Saline-Alkali Land, Dongying Vocational College, Dongying 257091, PR China.

**Supplementary file 1**

**Table S1** Primers for Quantitative Real-Time PCR (qRT-PCR)

| Genes name | Farword primer (5’-3’) | Reverse primer (5’-3’) |
| --- | --- | --- |
| *rpoB* | TCATGGACCAGAACAACCCG | AGCCGATCAGACCGATGTTC |
| *GmEF1α* | CGTCAAACTGTTGCTGTGGG | TCTTCTTCTGGGCAGCCTTG |
| *GmANTR1* | AAGAACGCAGAAGCCACGATGAG | GAGGTGTAGCGAAGGTGGAGGAG |
| *GmPHO1-H3* | TGTTGGCAGCTCAGATGAGG | AGCAGCCAGTAAACAGTCCC |
| *GmWRKY17* | CAGGATGACCCCAACATGCT | CCCTCGCTTAAACAGGCTGA |
| *GmWRKY11* | CTGCTCCCAAATCACCGACT | GGGTTTCTGGTTGAGGCTGA |
| *GmWRKY6* | CCAGTGGCACAGCAGAAG | CGCACCATCTCTAGCTCCAG |
| *GmHIPP39* | ATCACTGCCAAAACCGCATG | CCACCCCAAATCCATGGTCA |
| *GmPC7* | GCTGAATGCCCTGGTGTAGT | CGTAACGGATCTGCTGCTCT |
| *GmGSTU37* | GCTCCAATCTTGCCCTCTGA | ACTCCTTCTTCCCTGCCTCA |
| LOC100499701 | CGTTGACGCATGGAACGATC | GTGCAATGAAACGGCATGGT |
| *GmPETH* | GGCATGGCTCTTTTTGGGTG | AGCCATTCGGGTTTGGATGT |
| LOC100813442 | TGGCTTCCATTGCAACAACG | CAACGGCGCAACTTTCTCAA |
| *GmPSY1* | GGAAGTAAACGTGGCTCCCA | GTGGCCTAGGCTTGCTACAA |
| *GmAOC4* | TTGTAGAAGCCAGGCTGAGC | AGGGCTTCCACGATCTCTCT |
| *GmTPS22* | TCTCCACTCACTGCCACCTTCC | CACGGCACCCAGAGAGGATTTG |
| *GmTPS2* | AACAGGACATGGACTCGCTG | TTTGTCTCCTTCCCGATGCC |
| *GmZDS* | CGCCTTCGCTGCTCCTTAGATG | AGTTGACATGCCTGCAAGTCCAG |
| *GmD27* | CTGGGGATGCCAGTCAACAT | GAGGCAGTCTGTTCCATGCT |
| *GmSDR1* | AGAGCTTGGTCTTTCTGGCC | GTCCCATTGTGCTCCAGGAA |
| Genes name | Farword primer (5’-3’) | Reverse primer (5’-3’) |
| *GmSHT* | CAGCGACACCATTGAGAGGT | TTGTCAAGCTCAACCTGCCA |
| *GmGDH1* | TCCTCGTATGGGAGCCTTCA | AGTGTTGCTGAGAGTGGAGC |
| *GmGS-2* | TCAACAGGCTCGAGGGTCTA | GCGCACATCAATTCCTGTCC |
| *GmF3GGT1* | TGAGCCACCCAACACTGTTT | GCCAGTGAGTTCAAGACCCA |
| *GmCCL5* | CAGCACCTGAGGAGCTACACAAG | CCACGGGAACTTGAGGCAACTC |
| *GmCAD1* | GGGCTGCTTCAGACACTTCT | TGGAGATCCGAGTGGCAAAC |

**Supplementary file 2**

**Table S2** Pairwise Comparison of the M57 Genome with Type Strain Genomes

| Query | Subject | *d4*​ | c. l. *d4*​ | Diff.G+C Percent |
| --- | --- | --- | --- | --- |
| M57.assembly.fasta | *Streptomyces*  *kebangsaanensis* SUK12 | 36.4 | [33.9-38.9] | 0.42 |
| M57.assembly.fasta | *Streptomyces triticisoli*  NEAU DSCPA1-4-4 | 36.0 | [33.5-38.5] | 0.25 |
| M57.assembly.fasta | *Streptomyces thermoalcalitolerans* JCM10673 | 32.3 | [29.9-34.8] | 0.11 |
| M57.assembly.fasta | *Streptomyces*  *thermogriseus* JCM11269 | 32.0 | [29.6-34.6] | 0.6 |
| M57.assembly.fasta | *Streptomyces*  *Mahasarakhamensis* MK5 | 31.0 | [28.6-33.5] | 0.26 |
| M57.assembly.fasta | *Streptomyces spiralis*  JCM 3302 | 31.0 | [28.6-33.5] | 0.12 |
| M57.assembly.fasta | *Streptomyces naganishii*  JCM 4654 | 30.7 | [28.3-33.2] | 1.47 |
| M57.assembly.fasta | *Streptomyces*  *sennicomposti* RCPT1-4 | 30.7 | [28.3-33.2] | 1.94 |
| M57.assembly.fasta | *Streptomyces mexicanus*  JCM 12681 | 30.4 | [28.0-32.9] | 1.36 |
| M57.assembly.fasta | *Streptomyces anandii*  JCM 4720 | 30.3 | [27.9-32.8] | 1.2 |
| M57.assembly.fasta | *Streptomyces yaanensis*  CGMCC 4.7035 | 27.1 | [24.8-29.6] | 0.79 |
| M57.assembly.fasta | *Streptomyces lucensis*  JCM 4490 | 26.8 | [24.4-29.3] | 1.01 |
| M57.assembly.fasta | *Streptomyces camelliae*  HUAS 2-6 | 26.8 | [24.5-29.3] | 0.03 |
| M57.assembly.fasta | *Streptomyces*  *Panaciradicis* NBRC 109811 | 26.8 | [24.5-29.3] | 0.55 |
| M57.assembly.fasta | *Streptomyces*  *barringtoniae* JA03 | 26.7 | [24.4-29.2] | 0.15 |
| M57.assembly.fasta | *Streptomyces fodineus*  TW1S1 | 26.7 | [24.4-29.2] | 0.07 |
| M57.assembly.fasta | *Streptomyces*  *broussonetiae* T44 | 26.4 | [24.0-28.9] | 0.27 |
| M57.assembly.fasta | *Streptomyces lanatus*  JCM 4588 | 26.0 | [23.7-28.5] | 0.76 |
| M57.assembly.fasta | *Streptomyces galilaeus*  JCM 4757 | 26.0 | [23.6-28.4] | 0.05 |
| M57.assembly.fasta | *Streptomyces cirratus*  JCM 4738 | 22.3 | [20.0-24.8] | 0.84 |

*d4* : sum of all identities found in HSPs divided by overall HSP length

**Supplementary file 3**

**Table S3** Statistics of Plant Growth-Promoting Related Genes in the M57 Genome

| Genes associated with plant growth-promoting in the genome | | M57 |
| --- | --- | --- |
| Biosynthesis of indole-3 acetic acid | amidase | |
| indole-3-glycerol phosphate synthase | |
| styrene monooxygenase/indole monooxygenase family protein | |
| aminodeoxychorismate/anthranilate synthase component II | |
| anthranilate phosphoribosyltransferase | |
| anthranilate synthase family protein | |
| Bifunctional1-(5-phosphoribosyl)-5-((5-phosphoribosylamino)methylideneamino)imidazole-4-carboxamide isomerase/phosphoribosylanthranilate isomerase PriA | |
| anthranilate synthase component I | |
| indole-3-glycerol phosphate synthase TrpC | |
| tryptophan synthase subunit beta | |
| tryptophan synthase subunit alpha | |
| Phosphate solubilization | alkaline phosphatase family protein | |
| malate synthase A | |
| citramalate synthase | |
| acetate kinase | |
| pyruvate kinase | |
| inorganic pyrophosphatase | |
| citrate synthase 2 | |
| citrate synthase | |
| 2-isopropylmalate synthase | |
| bifunctional RNase H/acid phosphatase | |
| alkaline phosphatase D family protein | |
| pyruvate kinase | |
| bifunctional YncE family protein/alkaline phosphatase family protein | |
| HAD family acid phosphatase | |
| polyphosphate kinase 2 | |
| Production and uptake of siderophores | IucA/IucC family siderophore biosynthesis protein | |
| siderophore-interacting protein | |
| iron-siderophore ABC transporter substrate-binding protein | |
| Organic acid biosynthesis | 3-isopropylmalate dehydrogenase | |
| class II fumarate hydratase | |
| NADP-dependent malic enzyme | |
| benzoylformate decarboxylase | |
| glucose 1-dehydrogenase | |
| succinate dehydrogenase | |
| glucose-6-phosphate dehydrogenase | |
| pyruvate dehydrogenase | |
| aconitate hydratase AcnA | |
| Genes associated with plant growth-promoting in the genome | | M57 |
| Organic acid biosynthesis | fumarate hydratase | |
| malate dehydrogenase | |
| trans-aconitate 2-methyltransferase | |
| phosphoenolpyruvate carboxylase | |
| glutamate synthase | |
| Nitrogen fixation | glucose 1-dehydrogenase | |

|  |
| --- |

**Supplementary file 4**

**Table S4** Identification of Plant Growth-Promoting Traits of M57

|  | Cultivation and testing results |
| --- | --- |
| nitrogen fixation | + |
| Phosphorus solubilization | + |
| Siderophore production | + |
| IAA production | + |

“+”: Positive experimental result (n=3).

**Supplementary file 5**

**Table S5** Sequencing Data Quality of Soybean Rhizosphere Transcriptome Samples

| Sample | Raw reads | Raw bases | Clean reads | Clean bases | Q20 | Q30 | GC pct |
| --- | --- | --- | --- | --- | --- | --- | --- |
| CK-1 | 49312980 | 7.4G | 47450362 | 7.12G | 98.96 | 96.9 | 42.28 |
| CK-2 | 47950606 | 7.19G | 47130848 | 7.07G | 98.95 | 96.89 | 43.75 |
| CK-3 | 42333248 | 6.35G | 40574006 | 6.09G | 99.04 | 97.15 | 42.25 |
| M57-1 | 46973174 | 7.05G | 46219096 | 6.93G | 99 | 96.97 | 45.15 |
| M57-2 | 41933164 | 6.29G | 40869866 | 6.13G | 98.99 | 97.03 | 43.11 |
| M57-3 | 41803354 | 6.27G | 40257296 | 6.04G | 99.01 | 97 | 42.62 |

Sample: Sample name, Raw reads: Number of reads in raw data, Raw bases: Number of bases in raw data (raw bases = raw reads × 150 bp), Clean reads: Number of reads after raw data filtering,Clean bases: Number of bases after raw data filtering (clean bases = clean reads × 150 bp), Q20: Percentage of bases with Phred quality score > 20 relative to the total number of bases, Q30: Percentage of bases with Phred quality score > 30 relative to the total number of bases, GC pct: Percentage of guanine (G) and cytosine (C) bases relative to the four types of bases in clean reads

**Supplementary file 6**

**Table S6** Alignment of Clean Reads with the Soybean Reference Genome

| Sample | Total reads | Total map | Unique map | Multi map | Positive map | Negative map |
| --- | --- | --- | --- | --- | --- | --- |
| CK 1 | 47450362 | 41310412  (87.06%) | 40673473  (85.72%) | 636939  (1.34%) | 20339041  (42.86%) | 20334432  (42.85%) |
| CK 2 | 47130848 | 36429547  (77.29%) | 35731818  (75.81%) | 697729  (1.48%) | 17865089  (37.91%) | 17866729  (37.91%) |
| CK 3 | 40574006 | 37619205  (92.72%) | 37065100  (91.35%) | 554105  (1.37%) | 18531992  (45.67%) | 18533108  (45.68%) |
| M57-1 | 46219096 | 34675024  (75.02%) | 34119078  (73.82%) | 555946  (1.2%) | 17074362  (36.94%) | 17044716  (36.88%) |
| M57-2 | 40869866 | 35156323  (86.02%) | 34595028  (84.65%) | 561295  (1.37%) | 17308216  (42.35%) | 17286812  (42.3%) |
| M57-3 | 40257296 | 37930539  (94.22%) | 37287647  (92.62%) | 642892  (1.6%) | 18636560  (46.29%) | 18651087  (46.33%) |

Sample: Sample name, Total reads: Number of clean reads after sequencing data quality control, Total Mapped Reads: Number and percentage of reads mapped to the reference genome, Uniquely Mapped Reads: Number and percentage of reads mapped to a single unique location in the reference genome (reads used for subsequent gene quantification analysis), Multi-Mapped Reads: Number and percentage of reads mapped to multiple locations in the reference genome, Positively Mapped Reads: Number and percentage of reads mapped to the positive strand of the reference genome, Negatively Mapped Reads: Number and percentage of reads mapped to the negative strand of the reference genome

**Supplementary file 7**

**Table S7** DEGs Related to Phosphorus Metabolism, Oxidative Stress, Photosynthesis, Hormone and Secondary Metabolite Biosynthesis in E- and E+ Groups

|  | Gene id | Gene name | Log2FoldChange | Regulated |
| --- | --- | --- | --- | --- |
| Absorption and transport of phosphorus | 100787020 | *GmANTR1* | 7.79 | up |
| 100780548 | *GmPHO1-H3* | -8.44 | down |
| 732589 | *GmWRKY17* | -2.30 | down |
| 100127386 | *GmWRKY11* | -1.45 | down |
| 100802124 | *GmWRKY6* | -1.45 | down |
| 100127382 | *GmWRKY6* | -1.79 | down |
| 100795177 | *GmWRKY6* | -1.56 | down |
| 547669 | *GmHIPP39* | 1.93 | up |
| 547821 | *GmVSPA* | 9.47 | up |
| Oxidative stress | 547504 | *GmPC7* | 3.62 | up |
| 100817540 | *GmPER50* | 2.07 | up |
| 100777946 | *GmPER44* | 8.24 | up |
| 102660930 | *GmPER39* | 1.39 | up |
| 100812961 | *GmPER10* | 2.34 | up |
| 100785485 | *GmPER21* | 2.01 | up |
| 100805171 | *GmPER10* | 1.75 | up |
| 547499 | *GmPER22* | 1.19 | up |
| 100815671 | *GmPNC1* | 2.72 | up |
| 100789249 | *GmPNC2* | 7.26 | up |
| 547950 | *GmGSTU37* | 4.19 | up |
| 100499701 | LOC100499701 | 1.66 | up |
| 100800129 | *GmAt1g08570* | 1.66 | up |
| 100785914 | *GmTDX* | 1.05 | up |
| 100784901 | *GmAt1g08570* | 1.35 | up |
| Photosynthesis | 100793840 | *GmPETH* | 1.79 | up |
| 100813442 | LOC100813442 | 3.38 | up |
| 100305948 | LOC100305948 | 1.86 | up |
| 100784808 | LOC100784808 | 4.87 | up |
| 100782394 | *GmPSY1* | 2.94 | up |
| 100817119 | LOC100817119 | 7.15 | up |
| 100776502 | *GmZDS* | 1.26 | up |
| 100813404 | *GmD27* | 2.05 | up |
| Hormone metabolism | 100803666 | *GmAOC4* | -3.92 | down |
| 100037481 | *GmAOS1* | -3.55 | down |
| 100037482 | *GmAOS2* | -2.92 | down |
| 100805194 | *GmAOC6* | -2.55 | down |
| 100795498 | *GmAOC3* | -1.72 | down |
| 100810890 | *GmAOS3* | -1.43 | down |
|  | Gene id | Gene name | Log2FoldChange | Regulated |
| Synthesis of secondary metabolites | 100784193 | *GmTPS22* | 2.18 | up |
| 100808585 | *GmTPS2* | 2.69 | up |
| 100803877 | *GmSDR1* | 2.10 | up |
| 100802888 | *GmSHT* | 1.59 | up |
| 100808470 | *GmF3GGT1* | 1.83 | up |
| 100783104 | *GmCCL5* | 1.71 | up |
| 100819684 | *GmCAD1* | 7.69 | up |
| 100789509 | *GmGDH1* | 3.15 | up |
| 548036 | *GmGS-2* | 3.13 | up |

**Supplementary file 8**


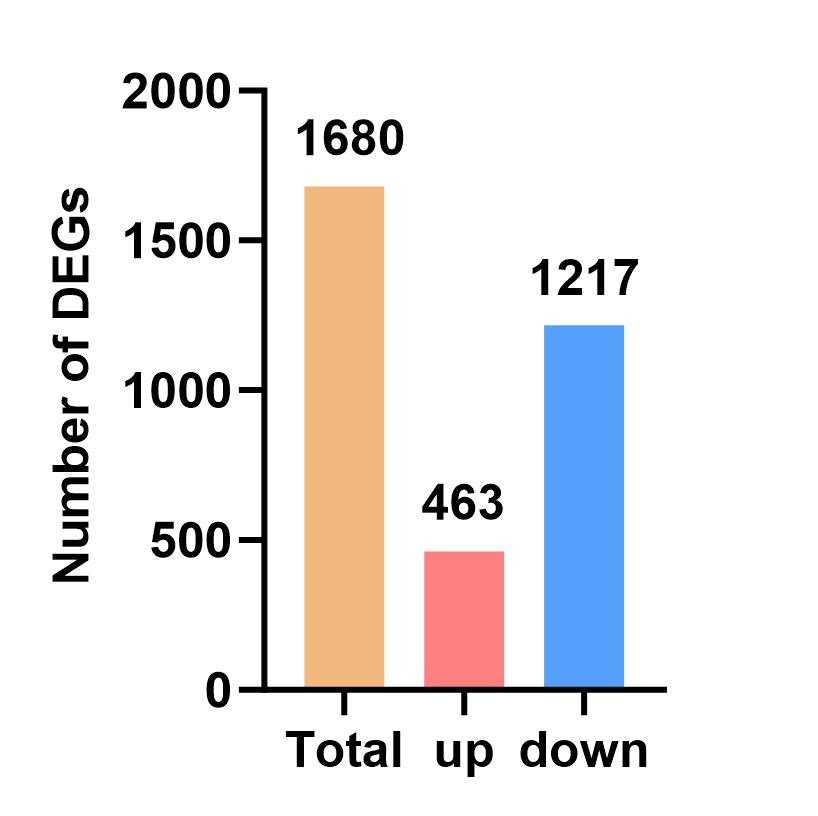


**Fig. S1** Statistics of Upregulated and Downregulated DEGs in Soybean Roots of E- and E+ Groups. E-: Untreated soybean plants; E+: Soybean plants inoculated with M57. A total of 1680 DEGs were identified, including 463 upregulated and 1217 downregulated genes.

**Supplementary file 9**


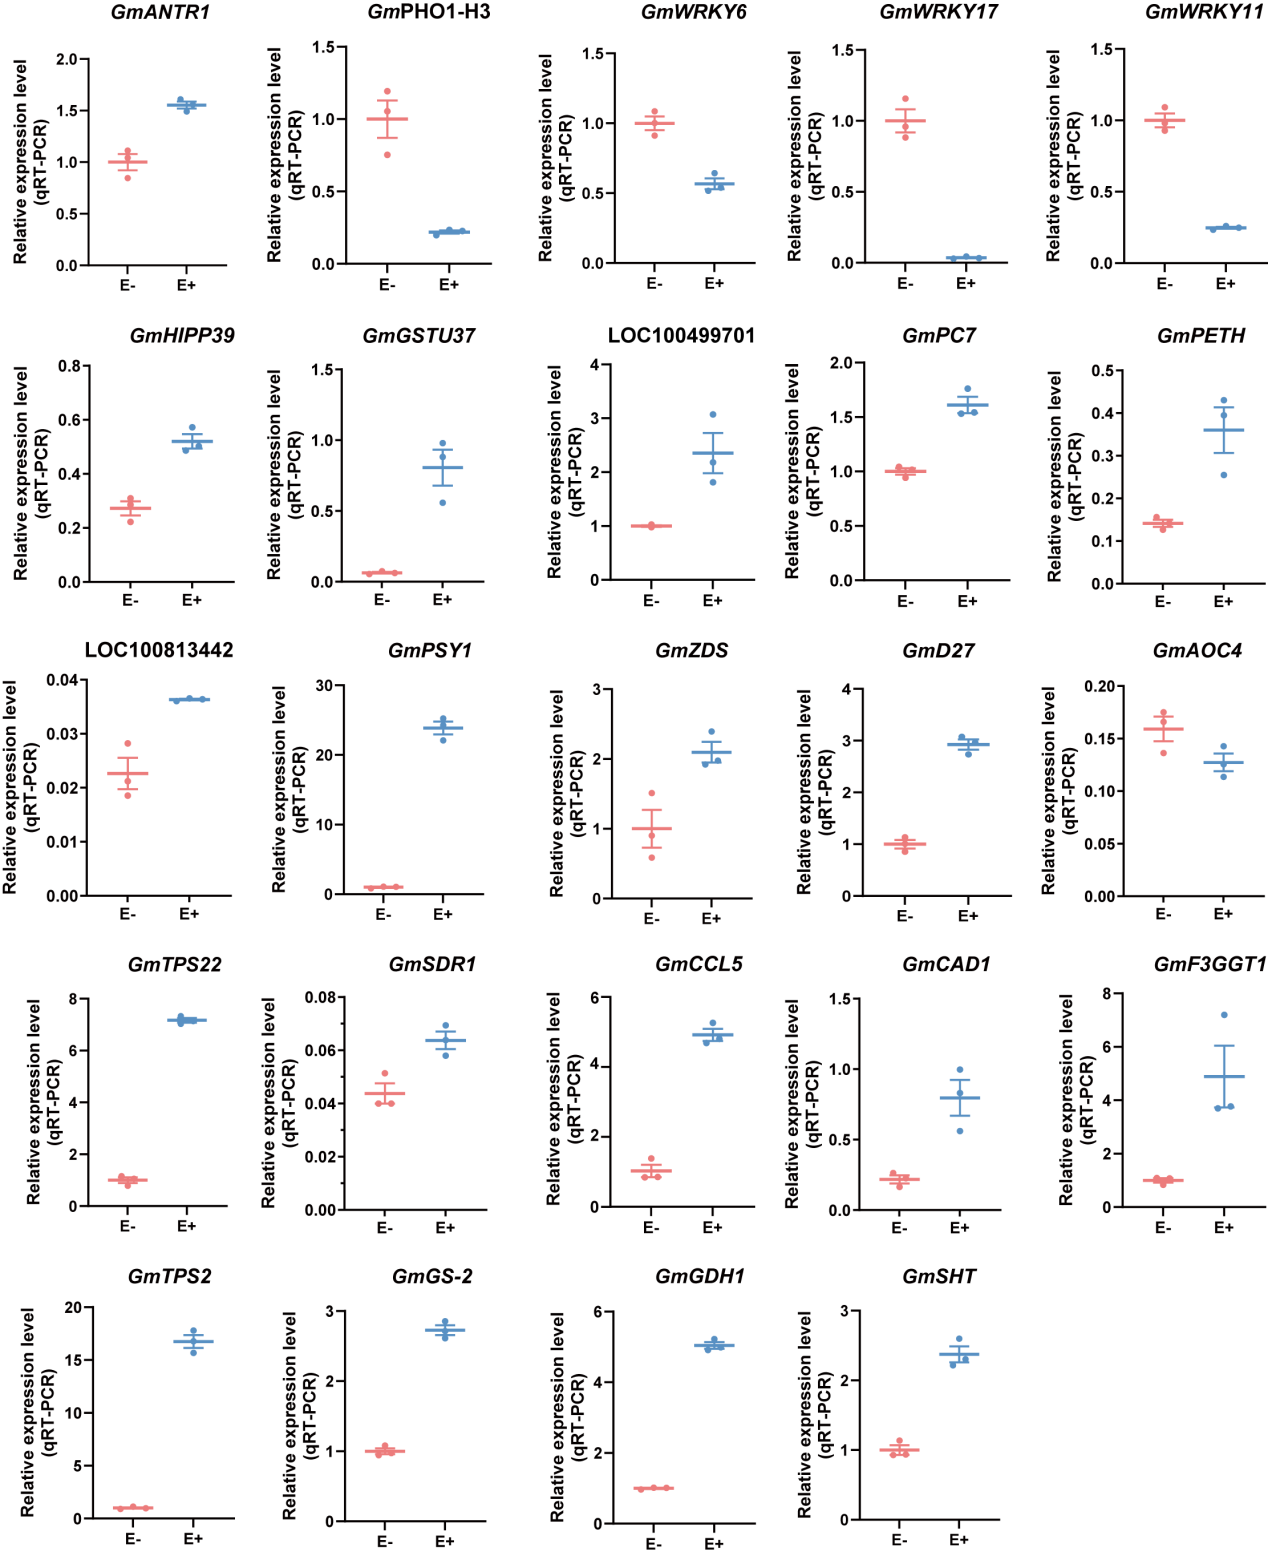


**Fig. S2** qRT-PCR Validation of Selected DEGs in Soybean Roots. E-: Untreated soybean rhizosphere samples, E+: Soybean rhizosphere samples inoculated with M57, Data are presented as the mean ± standard error (SE, n=3).
